# Supplementary material for: Conversion of Waste Corn Straw to Value-Added Fuel via Hydrothermal Carbonization after Acid Washing
Source: MDPI journal article supplement (doi:10.3390/en15051828), 2022-03-01
Supplement: s1 [file s1]

# Supplementary Materials: Conversion of waste corn straw to value-added fuel via hydrothermal carbonization after acid washing

Shulun Han <sup>a</sup>, Li Bai <sup>a,\*</sup>, Mingshu Chi <sup>a</sup>, Xiuling Xu <sup>b</sup>, Zhao Chen <sup>a</sup> and Kecheng Yu <sup>a</sup>

<sup>a</sup>School of Municipal and Environmental Engineering, Jilin Jianzhu University, Changchun, 130118, China

<sup>b</sup>Library of Jilin Jianzhu University, Changchun, 130118, China

\* Correspondence: authors: *Li Bai*, E-mail: baili@jlju.edu.cn

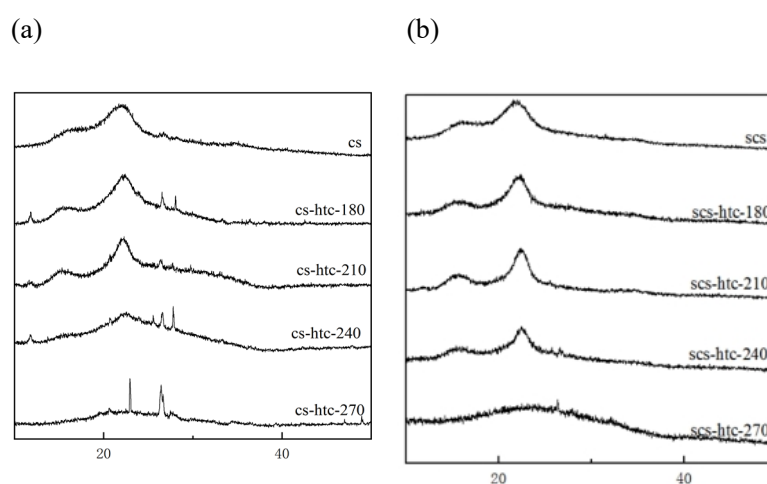

**Figure S1.** XRD analysis of CS, SCS and their hydrochar, (a) CS and (b) SCS.

**Table S1.** Fuel properties of hydrochars

| Sample       | Proximate analysis/wt.% |                 |           | HHV<br>(MJ/kg) | Yield<br>% | Energy<br>densification | Energetic<br>Recovery<br>efficiency (%) | Elemental analysis/wt.% |         |                |          |
|--------------|-------------------------|-----------------|-----------|----------------|------------|-------------------------|-----------------------------------------|-------------------------|---------|----------------|----------|
|              | VM                      | FC <sup>a</sup> | Ash       |                |            |                         |                                         | C                       | H       | O <sup>b</sup> | N        |
| CS           | 67.6±0.1                | 17.8±0.29       | 14.6±0.05 | 16.3±0.06      | 100        | -                       | -                                       | 41.9±0.2                | 5.8±0.1 | 35.4±0.3       | 1.7±0.3  |
| CS-HTC-180   | 68.6±0.2                | 16.2±0.42       | 15.2±0.21 | 17.3±0.12      | 75.4±0.2   | 1.06                    | 77.3                                    | 44.3±0.6                | 5.4±0.1 | 32.6±0.4       | 1.7±0.1  |
| CS-HTC-210   | 61.8±0.5                | 19.8±0.3        | 18.4±0.23 | 18.6±0.25      | 67.9±0.4   | 1.14                    | 77.1                                    | 47.9±0.4                | 5.2±0.3 | 25.7±0.5       | 2.1±0.5  |
| CS-HTC-240   | 52.6±0.3                | 28.3±0.54       | 19.1±0.23 | 24.2±0.85      | 42.6±1.1   | 1.48                    | 63.1                                    | 54.3±0.3                | 4.7±0.1 | 18.9±0.8       | 2.3±0.1  |
| CS-HTC-270   | 37.5±0.3                | 40.94±0.22      | 21.5±0.22 | 25.9±0.85      | 38.5±1.3   | 1.58                    | 60.8                                    | 58±0.5                  | 4.2±0.4 | 15.6±0.4       | 2.3±0.2  |
| SCS          | 72.5±0.5                | 20.8±0.12       | 6.7±0.5   | 18.5±0.61      | 92.4±0.7   | -                       | -                                       | 47±0.4                  | 6.8±0.2 | 37.9±0.1       | 0.96±0.1 |
| SCS-HTC-180  | 73.3±0.3                | 18.6±0.4        | 8.08±0.02 | 19.1±0.04      | 72.3       | 1.22                    | 88.2                                    | 52.6±0.3                | 6.3±0.4 | 31.4±0.6       | 1.1±0.1  |
| SCS-HTC -210 | 71.8±0.6                | 18.64±0.11      | 9.6±0.11  | 21.2±0.04      | 64.2       | 1.36                    | 87.3                                    | 55.3±0.2                | 5.9±0.3 | 27.6±0.1       | 1.2±0.2  |
| SCS-HTC -240 | 53.1±0.6                | 37.15±0.23      | 9.8±0.6   | 26.9±0.41      | 46.7       | 1.65                    | 77.1                                    | 63.4±0.7                | 5.1±0.2 | 19.9±0.1       | 1.3±0.1  |
| SCS-HTC -270 | 40.7±0.3                | 49.07±0.04      | 10.3±0.14 | 27.7±0.35      | 41.7       | 1.69                    | 70.7                                    | 67±0.4                  | 5±0.2   | 15.8±0.2       | 1.5±0.1  |

<sup>a</sup> By difference: Fixed carbon%= 100% - volatile matter% -ash% <sup>b</sup> By difference: O% = 100% - C% -H% -N% -ash
